# Supplementary material for: Time-restricted feeding suppresses excess sucrose-induced plasma and liver lipid accumulation in rats
Source: PLoS One. 2018 Aug 15;13(8):e0201261. doi: 10.1371/journal.pone.0201261 (PMC6093648; doi:10.1371/journal.pone.0201261)
Supplement: S2 Table — (XLSX) [file pone.0201261.s002.xlsx]

## Sheet: S2 Table
S2 Table. Rhythmic analysis of body temperature by JTK_cycle analysis in Fig 3
	CDA	CDR	HSDA	HSDR	Two-way ANOVA
					Die-effect	Timing-ffect	Interaction
Phase	17.44±0.47	17.81±0.19	17.50±0.25	18.75±0.43	NS	0.05	NS
Amplitude	0.601±0.035	0.687±0.017	0.731±0.024	0.754±0.062	0.05	NS	NS
Body temperature variations in each rat showed significant (p<0.05) rhythmic oscillations.
The phasse and amplitudes were analyzed under fixed period of 24 hr in JTK_cycle analysis.
